# Supplementary material for: Clinicopathologic Features of Antibrush Border Antibody Disease
Source: PubMed Central journal article supplement — Kidney Int Rep. 2023 Nov 19;9(2):370–82. doi: 10.1016/j.ekir.2023.11.008 (PMC10851064; doi:10.1016/j.ekir.2023.11.008), 2023-11-19
Supplement: mmc1.pdf [file mmc1.pdf]

## Supplemental Figures and Tables.

**Supplemental Figure 1.** Spectrum of tubular injury in ABBA. A. Relatively preserved tubulointerstitium, PAS stain 200x. B. Acute tubular injury with an increase in spacing between tubular profiles due to interstitial edema, epithelial simplification, and dilation, H & E stain 200x. C. A protracted pattern of tubular injury with interstitial fibrosis separating the tubular profiles with corresponding epithelial simplification, Masson Trichrome stain 200x. D - F. Deposition of electron dense immune-type deposits is variable, with few small to confluent large deposits.

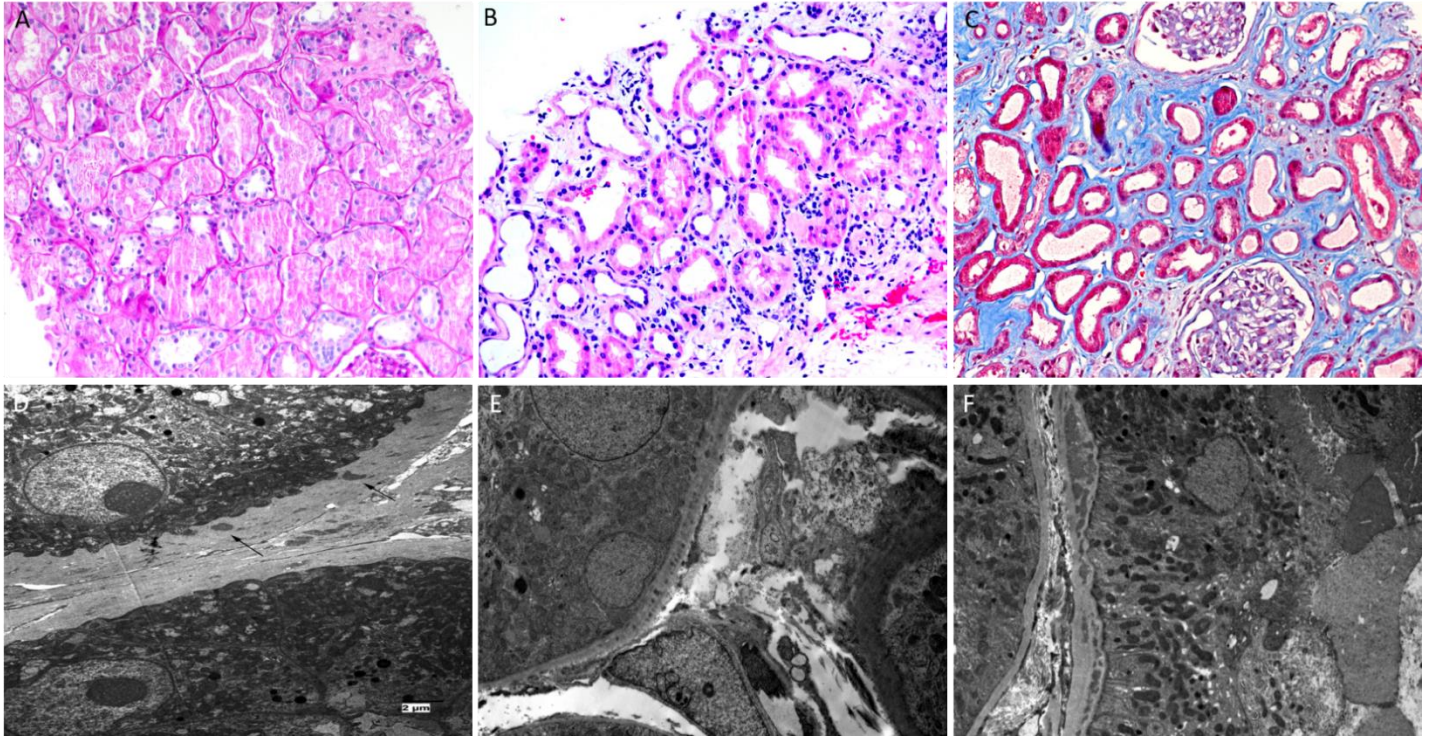

**Supplemental Figure 2.** Kidney biopsy showing a case of ABBA with tubular basement membrane deposits, but a lack of proximal tubular brush border staining. A. Severe acute tubular injury with a loss of brush borders, reactive nuclear changes, and large PAS-positive tubular basement membrane deposits, PAS stain, 600x. B. IgG staining along tubular basement membranes, IgG direct immunofluorescence, 400x.

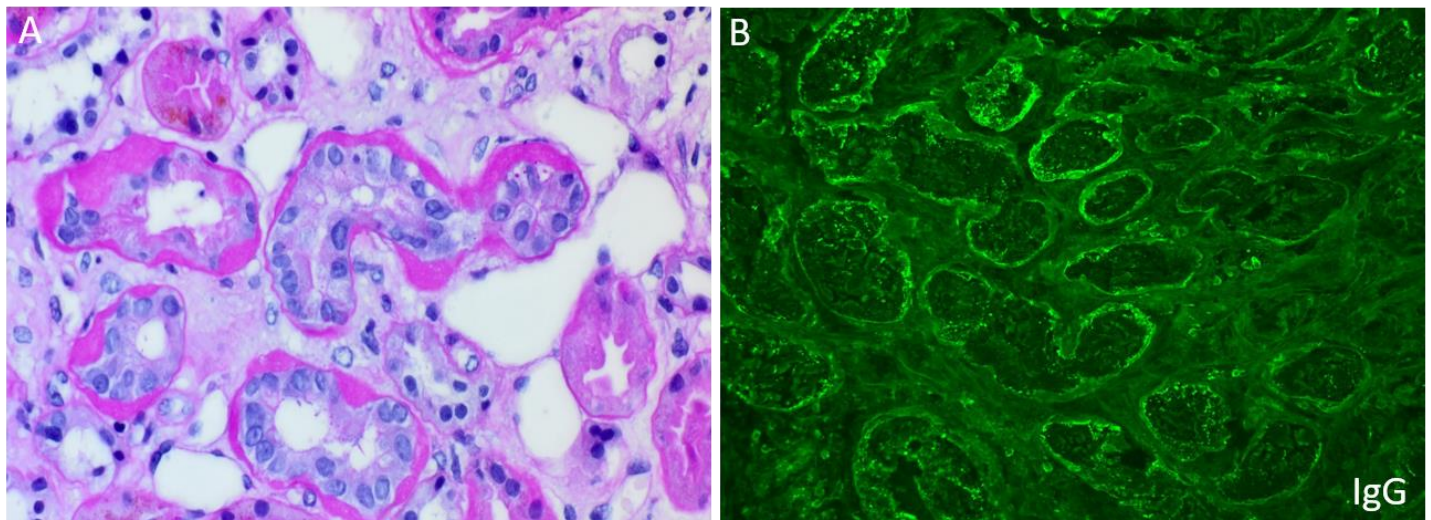

**Supplemental Figure 3.** Kidney biopsy showing a case of ABBA with IgG staining along the proximal tubular brush borders without corresponding tubular basement membrane deposits. A. IgG staining along the proximal tubular brush

borders, 600x. B. Albumin staining is negative along the proximal tubular brush borders, 600x. C. An indirect immunofluorescence assay from patient sera demonstrates seroreactivity for IgG along the proximal tubular brush border, 400x. D. An indirect immunofluorescence assay from a healthy control shows a lack of staining along the proximal tubular brush borders, 400x.

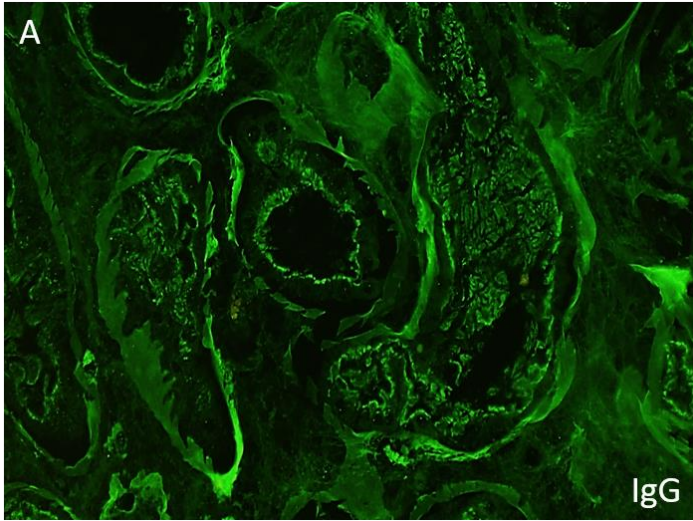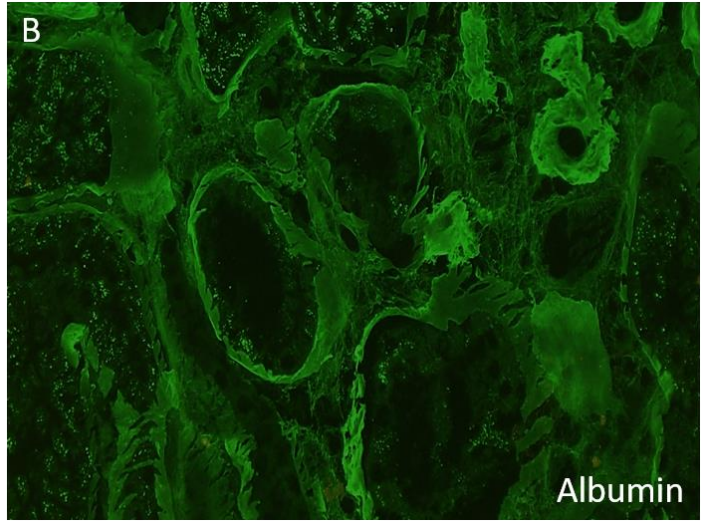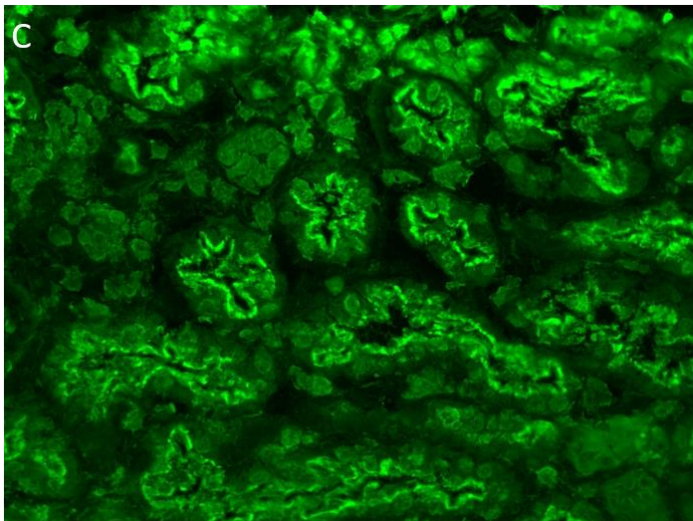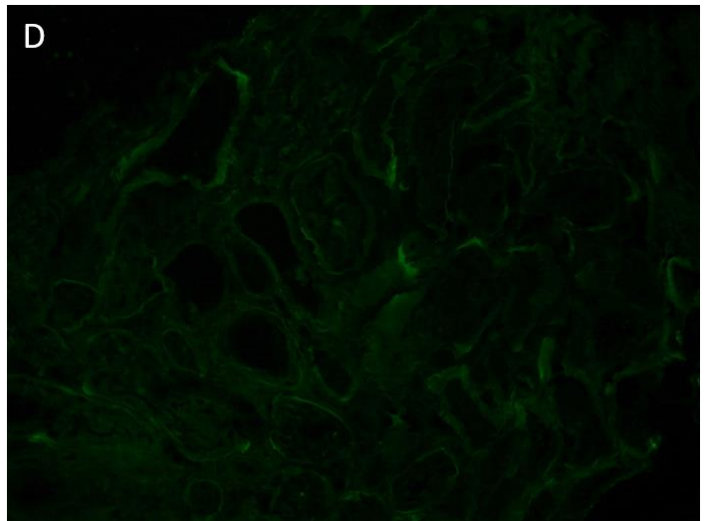

**Supplemental Figure 4.** Patient biopsy with LRP2, CUBN, and AMN within tubular basement membrane deposits, suggestive of epitope spreading in the patient's ABBA disease. A. Acute tubular injury with large TBM deposits, Jones methenamine silver stain, 400x. B. Ultrastructural photomicrograph showing large electron dense immune type deposits along TBMs. C. IgG immunofluorescence along TBMs, 400x. D. LRP2 immunofluorescence showing focal positivity within TBM deposits, 400x. E. CUBN immunofluorescence showing positivity within TBM deposits, 600x. F. Immunofluorescence for AMN showing positivity within TBM deposits, 600x.

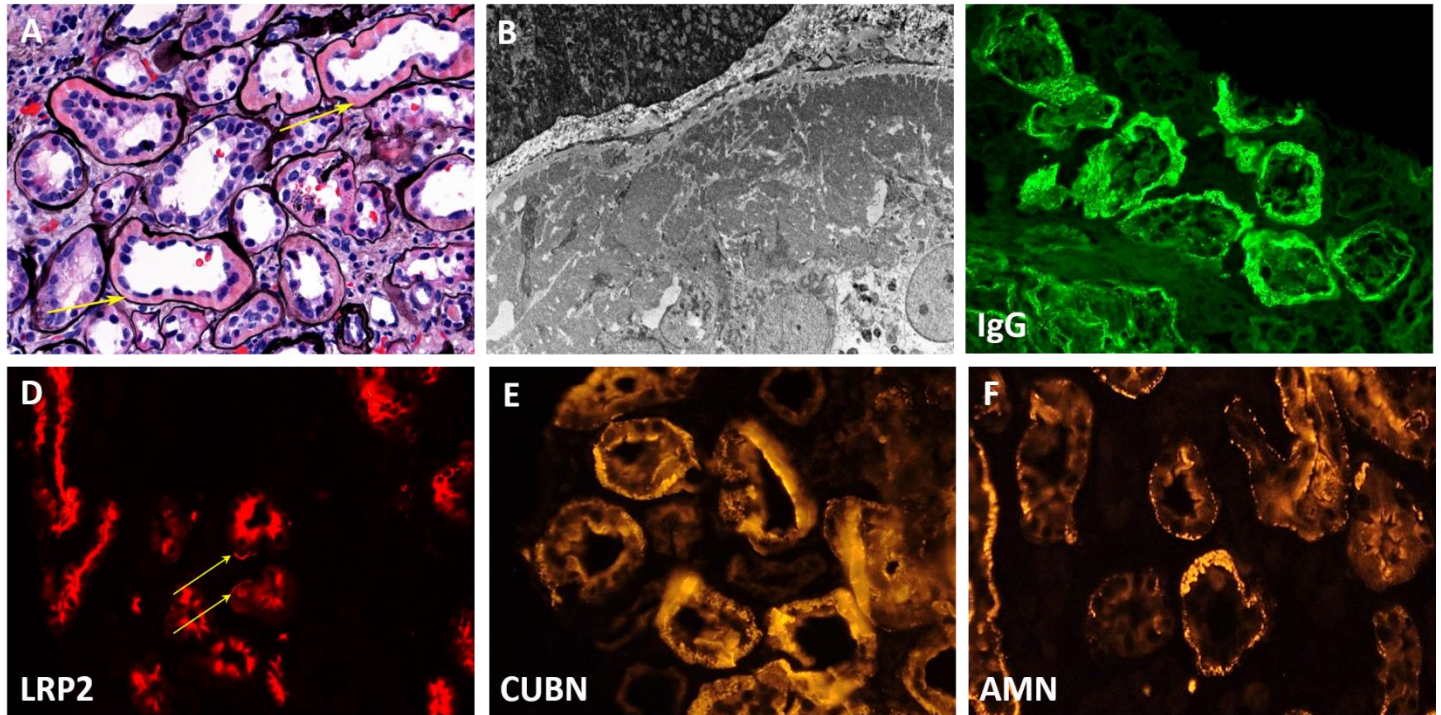

**Supplemental Figure 5.** LRP2 positivity in glomerular capillary loop deposits seen in a single case of ABBA. A. Paraffin immunofluorescence for LRP2 demonstrates a similar pattern of immune deposits (segmental capillary loop, Bowman's capsule, tubular basement membrane) as IgG staining (B).

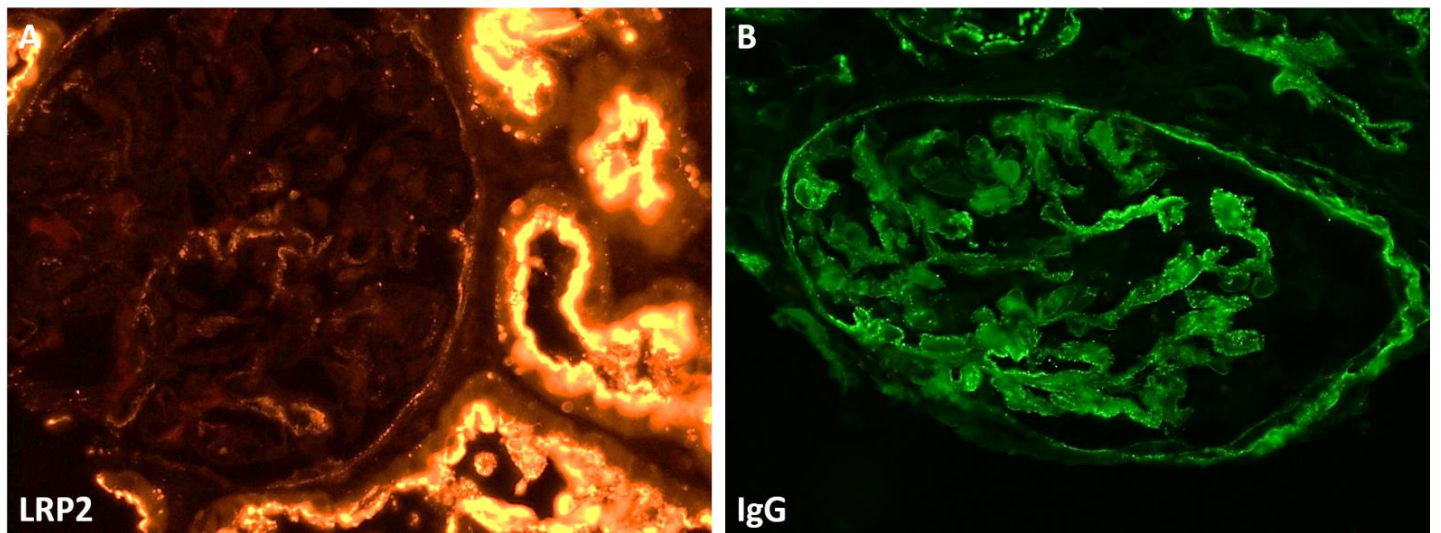

**Supplemental Figure 6.** Histopathologic spectrum of concurrent glomerular diseases in ABBA.

A - C) Case of minimal change disease in a patient with ABBA. A) Unremarkable glomerulus (Jones methenamine silver stain, original magnification 200x, scale bar = 50  $\mu\text{m}$ ). B) IgG immunofluorescence staining along proximal tubular brush borders (fluorescein-conjugated anti-human IgG, original magnification 200x, scale bar = 50  $\mu\text{m}$ ). C) Electron photomicrograph showing severe podocyte foot process effacement (original magnification 6000x).

D-F) Case of diabetic glomerulopathy in a patient with ABBA. D) Nodular mesangial expansion in a glomerulus (PAS stain, original magnification 400x, scale bar = 20  $\mu\text{m}$ ). E) Glomerulus with mesangial expansion and segmental sclerosis (PAS stain, original magnification 400x, scale bar = 20  $\mu\text{m}$ ). F) Electron photomicrograph showing thickened glomerular basement membranes (original magnification 12000x).

G - I) Case of MPO-ANCA-associated crescentic glomerulonephritis in a patient with anti-brush border antibody disease. G) Glomerulus with fibrinoid necrosis and cellular crescent formation (Jones methenamine silver stain, original magnification 400x, scale bar = 20  $\mu\text{m}$ ). H) Glomerulus with a cellular crescent (H & E stain, original magnification 400x, scale bar = 20  $\mu\text{m}$ ). I) Glomerulus with disruption of the capillary tuft by a cellular crescent, (Silver methenamine Masson trichrome stain, original magnification 400x, scale bar = 20  $\mu\text{m}$ ).

J - L) AL amyloidosis in a patient with anti-brush border antibody disease. J) Amorphous mesangial expansion in a glomerulus (PAS stain, original magnification 400x, scale bar = 20  $\mu\text{m}$ ). K) Immunofluorescence staining showing amorphous staining for lambda light chain with vessels (fluorescein conjugated anti-human lambda light chain staining, original magnification 400x, scale bar = 20  $\mu\text{m}$ ). No corresponding kappa light chain staining was present (data not shown). L) Electron photomicrograph showing mesangial replacement with capillary loop extension by small overlapping fibrils, consistent with amyloid (original magnification 15000x).

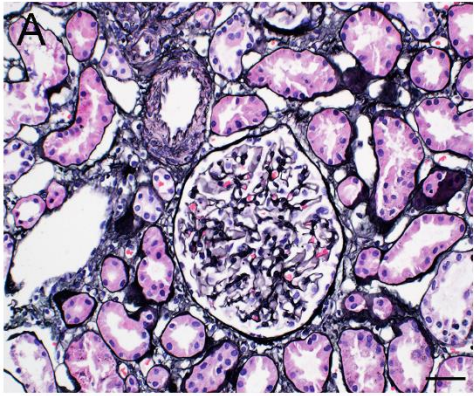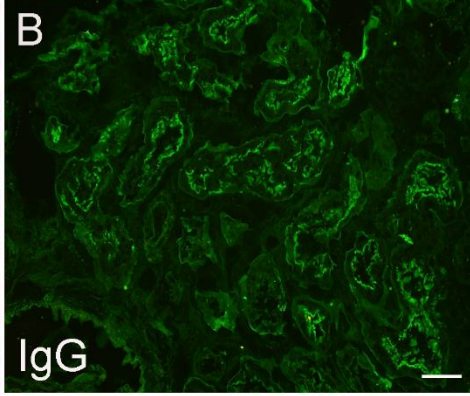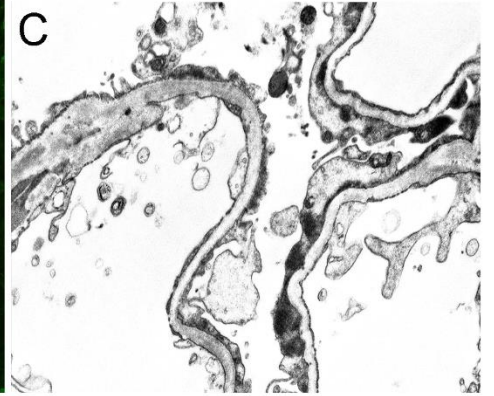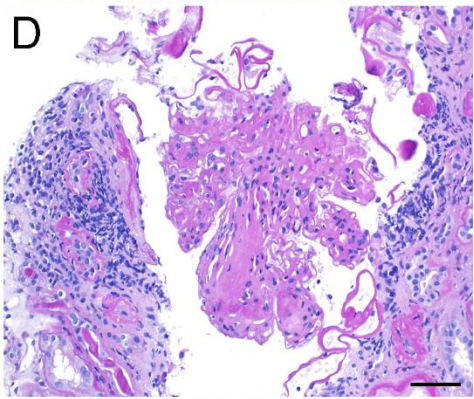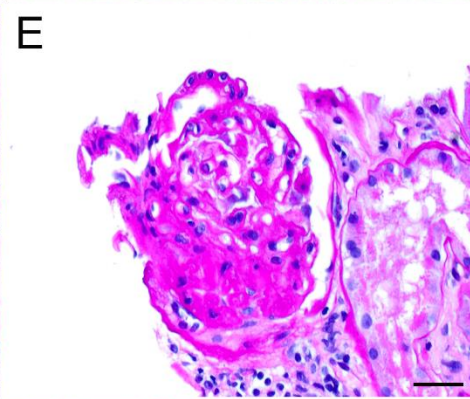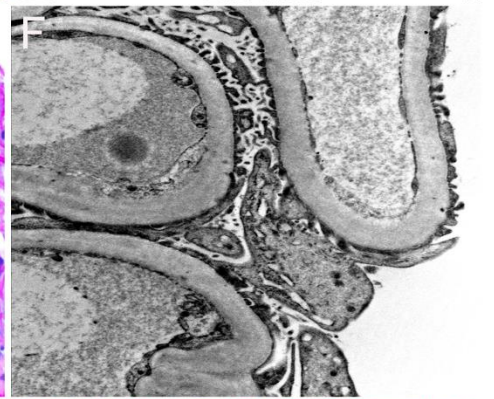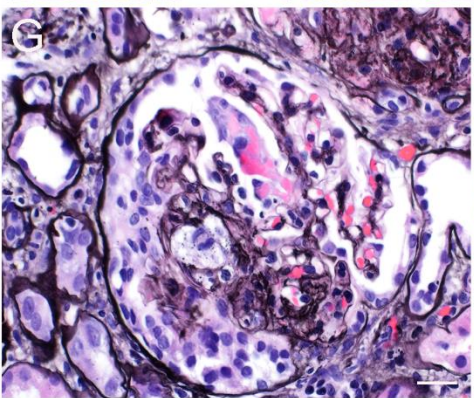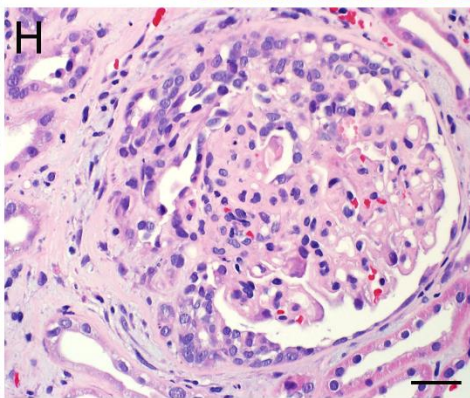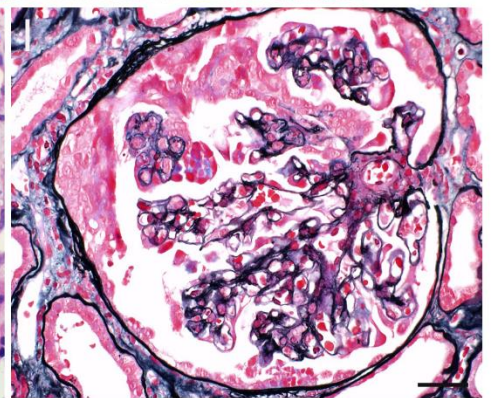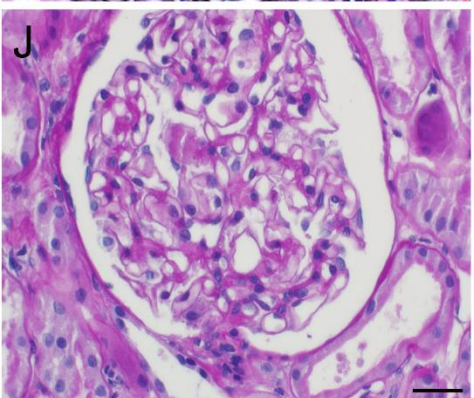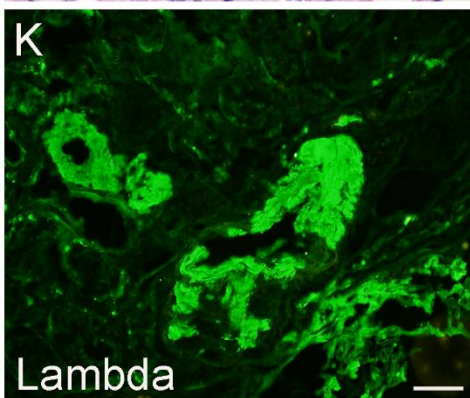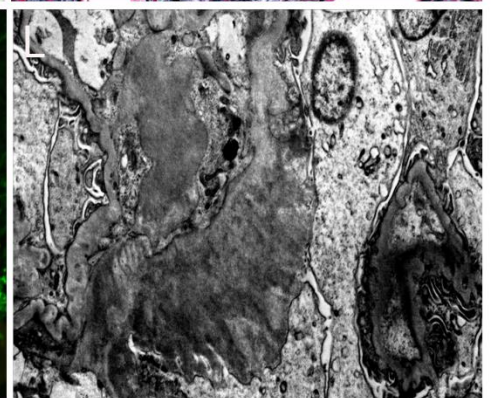

**Supplemental Figure 7.** Diagnostic algorithm for tubulointerstitial kidney diseases with tubular basement membrane IgG deposits.

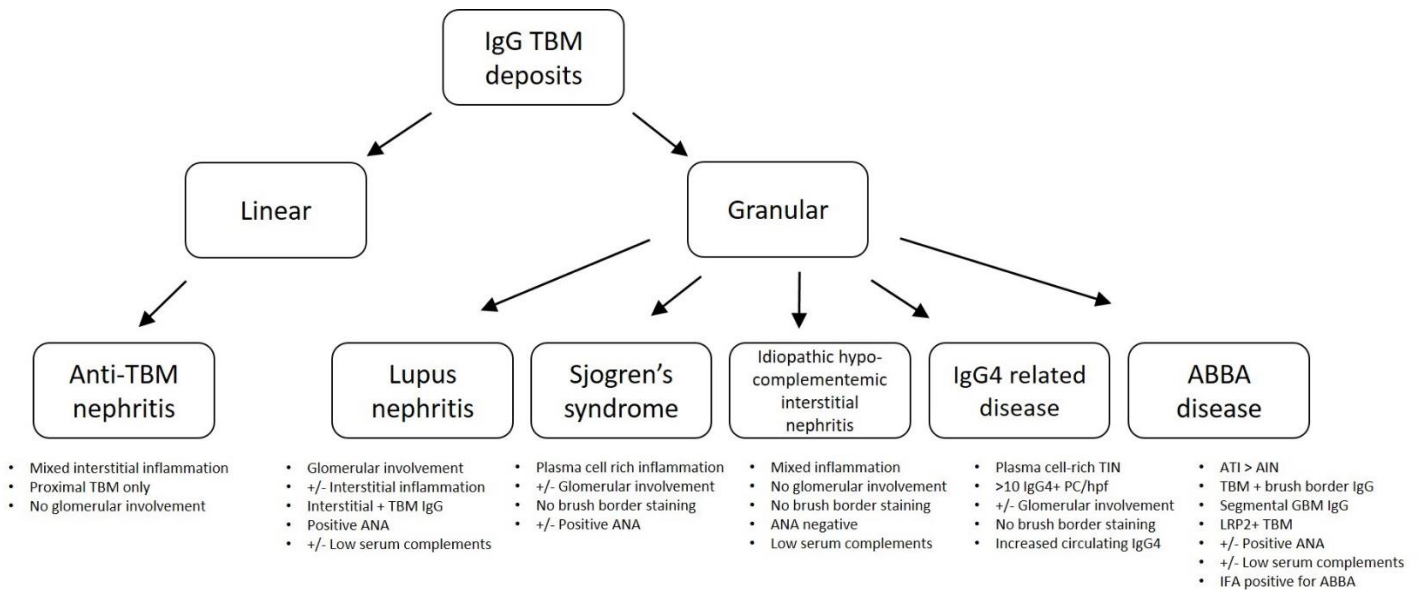

**Supplemental Table 1.** Patient characteristics with post-transplant recurrence

| Pt | Age | Sex | ESKD    | Time  | Presentation                                              | Post-transplant biopsies                                                             | Treatment                                                                            | Outcomes     |
|----|-----|-----|---------|-------|-----------------------------------------------------------|--------------------------------------------------------------------------------------|--------------------------------------------------------------------------------------|--------------|
| 1  | 60  | M   | MN      | 2.5 y | AKI<br>Nephrotic syndrome<br><br>AKI, minimal proteinuria | Podocytopathy x 3<br>LRP2 nephropathy x 3<br><br>LRP2 nephropathy, no podocytopathy  | Steroids<br>Tacrolimus<br>Mycophenolate<br>Plasmapheresis (after 3 <sup>rd</sup> bx) | No remission |
| 2  | 16  | M   | Unknown | 6 y   | AKI<br>Sub-nephrotic proteinuria<br>Positive DSA          | ABMR, C4d Positive<br>LRP2 nephropathy<br><br>ABMR, C4d Positive<br>LRP2 nephropathy | Steroids<br>Tacrolimus<br>Mycophenolate<br>Plasmapheresis                            | No remission |

Abbreviations: ESKD, end-stage kidney disease; M, male; y, years; AKI, acute kidney injury; DSA, donor-specific antibodies; bx; biopsy.

**Supplemental Table 2.** Patient characteristics with CR, SR, and PR (n=16 patients)

| No.              | Cr initial (mg/dL) | Cr follow-up (mg/dL) | IF/TA    | ABBA titer initial | ABBA follow-up titer                         | Treatment                   | Follow-up (days) | Concurrent disease? |
|------------------|--------------------|----------------------|----------|--------------------|----------------------------------------------|-----------------------------|------------------|---------------------|
| Patients with CR |                    |                      |          |                    |                                              |                             |                  |                     |
| 1                | 3.0                | 1.0                  | Moderate | 1:1000             | 1:100 (at 4 months), Negative (at 11 months) | Steroids + Cyclophosphamide | 365              | None                |
| 2                | 3.21               | 1.0                  | Mild     | Negative           | Negative                                     | Prednisone                  | 1014             | MCD                 |

|                  |         |      |                |        |          |                               |     |                     |
|------------------|---------|------|----------------|--------|----------|-------------------------------|-----|---------------------|
| 3                | Unknown | 0.44 | None           | N/A    | N/A      | Prednisone                    | 362 | MCD                 |
| 4                | 1.6     | 1.1  | Mild           | N/A    | N/A      | Prednisone + MMF              | 498 | Focal LN            |
| 5                | 2.6     | 1.2  | Mild           | N/A    | N/A      | Prednisone + MMF              | 70  | Focal crescentic GN |
| Patients with SR |         |      |                |        |          |                               |     |                     |
| 1                | 3.8     | 1.6  | Moderate       | N/A    | N/A      | Prednisone + Rituximab        | 90  | Focal crescentic GN |
| 2                | 3.5     | 1.6  | None           | 1:100  | Negative | Steroids + MMF + Tacrolimus   | 720 | FSGS-tip variant    |
| 3                | 6.7     | 2.2  | Severe         | 1:1000 | 1:1000   | No treatment                  | 320 | None                |
| Patients with PR |         |      |                |        |          |                               |     |                     |
| 1                | 2.3     | 1.9  | Moderate       | 1:100  | N/A      | None                          | 31  | Artneph             |
| 2                | 5       | 2.6  | Severe         | 1:1000 | N/A      | Prednisone                    | 90  | None                |
| 3                | 3.2     | 1.7  | Moderate       | N/A    | N/A      | Prednisone + MMF              | 224 | None                |
| 4                | 2.0     | 1.6  | Severe         | 1:100  | Negative | Prednisone + MMF              | 720 | MN                  |
| 5                | 3.6     | 1.4  | Moderate       | N/A    | Negative | Prednisone + Rituxumab        | 102 | IgAN                |
| 6                | 1.6     | 1.3  | Moderate; Mild | N/A    | N/A      | Prednisone + cyclophosphamide | 320 | None                |
| 7                | 11      | 2.2  | Severe         | N/A    | N/A      | Prednisone + MMF              | 141 | Chronic active TIN  |

**Abbreviations:** No., patient number; Cr, serum creatinine; IF/TA, interstitial fibrosis/tubular atrophy; ABBA, anti-brush border antibodies; CR, complete remission/response; SR, significant response; PR, partial response; N/A, not applicable; MMF, mycophenolate mofetil; MCD, minimal change disease; LN, lupus nephritis; GN, glomerulonephritis; FSGS, focal segmental glomerulosclerosis; IgAN, IgA nephropathy; Artneph, Arterionephrosclerosis; MN, membranous nephropathy; TIN, tubulointerstitial nephritis.

**Supplemental Table 3.** Patient characteristics with no remission (n=36 patients).

| No. | Cr initial (mg/dL) | Cr follow-up (mg/dL)  | IF/TA                  | ABBA titer initial | ABBA follow-up titer | Treatment                                                  | Follow-up (days) | Concurrent disease?                 |
|-----|--------------------|-----------------------|------------------------|--------------------|----------------------|------------------------------------------------------------|------------------|-------------------------------------|
| 1   | 8.8                | ESKD                  | Mild                   | 1:100              | 1:10                 | Prednisone                                                 | 240              | None                                |
| 2   | 2.7                | 4.2                   | Moderate               | 1:500              | N/A                  | Prednisone + ACEi, transplant                              | 720              | None                                |
| 3   | 7.6                | ESKD                  | Mild                   | N/A                | N/A                  | Prednisone                                                 | Unknown          | Proliferative GN, IC-type           |
| 4   | 14.7               | ESKD                  | Moderate               | 1:100              | N/A                  | Prednisone                                                 | 45               | Artneph                             |
| 5   | 3.6                | 3.4                   | Limited - scant cortex | N/A                | N/A                  | Prednisone                                                 | 35               | Nodular diabetic glomerulosclerosis |
| 6   | 1.3                | 0.9 (post-transplant) | Moderate               | 1:100              | N/A                  | Prednisone + transplant                                    | Unknown          | None                                |
| 7   | 1.7                | 2.2                   | Mild                   | 1:100              | N/A                  | Rituximab                                                  | 120              | None                                |
| 8   | 2.1                | 2.4                   | Mild                   | 1:100              | 1:10                 | Rituximab                                                  | 90               | None                                |
| 9   | 1.4                | 1.6                   | Moderate               | N/A                | N/A                  | Rituximab                                                  | 588              | None                                |
| 10  | N/A                | N/A Deceased          | Severe                 | N/A                | N/A                  | Prednisone + Cellcept                                      | 120              | Granulomatous TIN                   |
| 11  | 3.8                | ESKD                  | Moderate               | 1:1000             | N/A                  | Bortezomib + Rituximab + Dexamethasone                     | 150              | None                                |
| 12  | 4.4                | ESKD                  | Moderate               | 1:1000             | N/A                  | Prednisone + Rituximab                                     | 365              | None                                |
| 13  | 1.49               | 1.5                   | Mild                   | N/A                | N/A                  | Plasmapheresis + MMF + Prednisone + Tacrolimus, transplant | 226              | None                                |
| 14  | 1.35               | 1.75                  | Mild                   | N/A                | N/A                  | Daratumumab                                                | 319              | AL Lambda Amyloidosis               |
| 15  | 1.8                | 1.9                   | Moderate               | N/A                | N/A                  | SGLT2 inhibitor, no immunosuppression                      | 344              | None                                |
| 16  | 1.8                | 2.4                   | Moderate               | N/A                | N/A                  | SGLT2 inhibitor, no immunosuppression                      | Unknown          | Nodular diabetic glomerulosclerosis |
| 17  | 2.2                | 2.3                   | Severe                 | 1:500              | 1:500                | None                                                       | 390              | None                                |
| 18  | 1.67               | N/A; Deceased         | Moderate               | 1:10               | N/A                  | N/A                                                        | N/A              | None                                |
| 19  | 2.8                | N/A; Deceased         | Moderate               | 1:100              | N/A                  | N/A                                                        | N/A              | Artneph                             |
| 20  | 2.7                | N/A; Deceased         | Moderate               | 1:1000             | N/A                  | None                                                       | N/A              | None                                |
| 21  | 2.1                | 3.1                   | Moderate               | N/A                | N/A                  | None                                                       | 365              | None                                |
| 22  | 2.3                | 2.2                   | Moderate               | N/A                | N/A                  | Prednisone + MMF                                           | 600              | None                                |



|    |      |                                 |          |      |     |                                                                           |     |                                     |
|----|------|---------------------------------|----------|------|-----|---------------------------------------------------------------------------|-----|-------------------------------------|
| 23 | 2.1  | 5.0                             | Moderate | N/A  | N/A | None                                                                      | 270 | None                                |
| 24 | 3.0  | 6.0                             | Moderate | N/A  | N/A | None                                                                      | 104 | IgA nephropathy                     |
| 25 | 5.0  | 5.9                             | Moderate | N/A  | N/A | None                                                                      | 192 | Membranous nephropathy              |
| 26 | 3.79 | ESKD                            | Severe   | N/A  | N/A | None                                                                      | 61  | Nodular diabetic glomerulosclerosis |
| 27 | 7.2  | N/A;<br>Deceased                | Mild     | N/A  | N/A | None                                                                      | 10  | ATI with myoglobin casts            |
| 28 | 1.5  | 2                               | Severe   | N/A  | N/A | None                                                                      | 229 | Artneph                             |
| 29 | 6.28 | 1.4* +<br>nephrotic<br>syndrome | Mild     | N/A  | N/A | Prednisone                                                                | 60  | None                                |
| 30 | 6.3  | 3.2                             | Severe   | N/A  | N/A | Prednisone                                                                | 180 | None                                |
| 31 | 2.6  | 3.1                             | Severe   | 1:10 | N/A | Prednisone                                                                | 24  | Arterionephrosclerosis              |
| 32 | 2.1  | 5.0                             | Moderate | N/A  | N/A | None                                                                      | 270 | None                                |
| 33 | 5.8  | ESKD                            | Moderate | N/A  | N/A | Vincristine,<br>cyclophosphamide,<br>doxorubicin<br>(for B cell lymphoma) | 112 | Atypical lymphoid infiltrate        |
| 34 | 3.4  | ESKD                            | Severe   | N/A  | N/A | None                                                                      | 73  | None                                |
| 35 | 6.5  | 7.1; ESKD                       | Moderate | N/A  | N/A | None                                                                      | 175 | Atypical lymphoid infiltrate        |
| 36 | 6.5  | 3.8                             | Severe   | N/A  | N/A | Chemotherapy<br>for B cell lymphoma                                       | 210 | None                                |

**Abbreviations:** No., patient number; Cr, serum creatinine; IF/TA, interstitial fibrosis/tubular atrophy; ABBA, anti-brush border antibodies; ACEi, angiotensin-converting enzyme inhibitor; GN, glomerulonephritis; IC, immune complex; Artneph, arterionephrosclerosis; N/A, not applicable; TIN, tubulointerstitial nephritis; SGLT2, sodium-glucose cotransporter-2; ATI, acute tubular injury.

**Supplemental Table 4.** Comparison of ABBA patients who had serologic testing compared to patients without serologic disease confirmation. Two cases (one in each group) was a limited cortical sample and could not be analyzed for all histologic parameters.

| Parameter                                                | Serologic testing performed<br>n=30          | Serologic testing not performed<br>n=37       |
|----------------------------------------------------------|----------------------------------------------|-----------------------------------------------|
| <b>Histopathology</b>                                    |                                              |                                               |
| % Global glomerulosclerosis                              | 26.8 ± 16.1                                  | 28.2 ± 21.4                                   |
| Interstitial fibrosis                                    |                                              |                                               |
| - None                                                   | 1/29 (3.4%)                                  | 1/36 (2.8%)                                   |
| - Mild                                                   | 8/29 (27.6%)                                 | 10/36 (27.8%)                                 |
| - Moderate                                               | 16/29 (55.2%)                                | 17/36 (47.2%)                                 |
| - Severe                                                 | 4/29 (13.8%)                                 | 8/36 (22.2%)                                  |
| Tubular atrophy                                          |                                              |                                               |
| - None                                                   | 3/29 (10.3%)                                 | 2/36 (5.6%)                                   |
| - Mild                                                   | 6/29 (20.7%)                                 | 9/36 (25.0%)                                  |
| - Moderate                                               | 16/29 (55.2%)                                | 16/36 (44.4%)                                 |
| - Severe                                                 | 4/29 (13.8%)                                 | 9/36 (25.0%)                                  |
| Interstitial edema<br>(present/absent)                   | 20/30 (66.7%)                                | 26/37 (70.3%)                                 |
| IgG TBM deposits<br>(present/absent)                     | 30/30 (100%)                                 | 36/37 (97.3%)                                 |
| IgG brush borders<br>(present/absent)                    | 20/30 (66.7%)                                | 33/37 (89.2%)                                 |
| IgG Bowman's capsule<br>(present/absent)                 | 23/29 present (79.3%)<br>6/29 absent (20.7%) | 23/37 present (62.2%)<br>14/37 absent (37.8%) |
| IgG capillary loop<br>(present/absent)                   | 27/29 present (93.1%)<br>2/29 absent (6.9%)  | 29/37 present (78.4%)<br>8/37 absent (21.6%)  |
| <b>Time of biopsy clinical parameters</b>                |                                              |                                               |
| Serum creatinine at diagnosis<br>(mg/dL)                 | Mean 2.5 ± 2.8<br>Median 2.6                 | Mean 3.7 ± 2.5<br>Median 3.16                 |
| Proteinuria at diagnosis<br>(grams/day)                  | Mean 2.8 ± 3.3<br>Median 1.5                 | Mean 2.7 ± 2.7<br>Median 1.6                  |
| Hematuria (present/absent)                               | 16/22 (72.7%)                                | 14/22 (63.6%)                                 |
| ANA positivity or autoimmune<br>disease (present/absent) | 13/25 (52%)                                  | 7/15 (46.7%)                                  |
| Monoclonal paraprotein<br>(present/absent)               | 9/24 (37.5%)                                 | 10/20 (50%)                                   |
| <b>Follow-up data</b>                                    |                                              |                                               |
| Serum creatinine at follow-up<br>(mg/dL)                 | Mean 2.2 ± 1.3<br>Median 1.9                 | Mean 2.8 ± 1.8<br>Median 2.2                  |
| Proteinuria at follow-up<br>(grams/day)                  | Mean 1.1 ± 1.0<br>Median 0.85                | Mean 1.9 ± 2.4<br>Median 0.99                 |
| Remission (CR, SR, or PR)                                | n=26                                         | n=25                                          |
| - CR                                                     | 4 CR (15.4%)                                 | 2 CR (8.0%)                                   |
| - SR                                                     | 2 SR (7.7%)                                  | 1 SR (4.0%)                                   |
| - PR                                                     | 4 PR (15.4%)                                 | 4 PR (16.0%)                                  |
| - NR                                                     | 16 NR (61.5%)                                | 18 NR (72.0%)                                 |
| No remission                                             | 17/26 (65%)                                  | 15/29 (51.7%)                                 |
| Dialysis or ESKD                                         | 7                                            | 9                                             |

**Supplemental Table 5.** Comparison of IgG subclass staining within serum and kidney biopsy tissue.

| Case | Predominant IgG subclass serum | Predominant IgG subclass biopsy |
|------|--------------------------------|---------------------------------|
| 1    | 4                              | 1 and 4                         |
| 2    | 1 and 4                        | 1 and 4                         |
| 3    | 4                              | 4                               |
| 4    | 4                              | 1, 2, and 4                     |
| 5    | 4                              | 1 and 4                         |
| 6    | 4                              | 1 and 4                         |
| 7    | 4                              | 1                               |
| 8    | 1 and 4                        | 1 and 4                         |
| 9    | 4                              | 1 and 4                         |
| 10   | 1 and 4                        | 1 and 4                         |
| 11   | 1                              | 1,2, and 4                      |
| 12   | 1 and 4                        | 1 and 4                         |
| 13   | 1 and 4                        | 1, 2, and 4                     |
| 14   | 4                              | 4                               |
